# Supplementary material for: A Novel Immunofluorescence Assay for the Rapid Serological Detection of SARS-CoV-2 Infection
Source: MDPI journal article supplement (doi:10.3390/v13050747), 2021-04-24
Supplement: s1 [file s1]

# SUPPLEMENTARY DATA

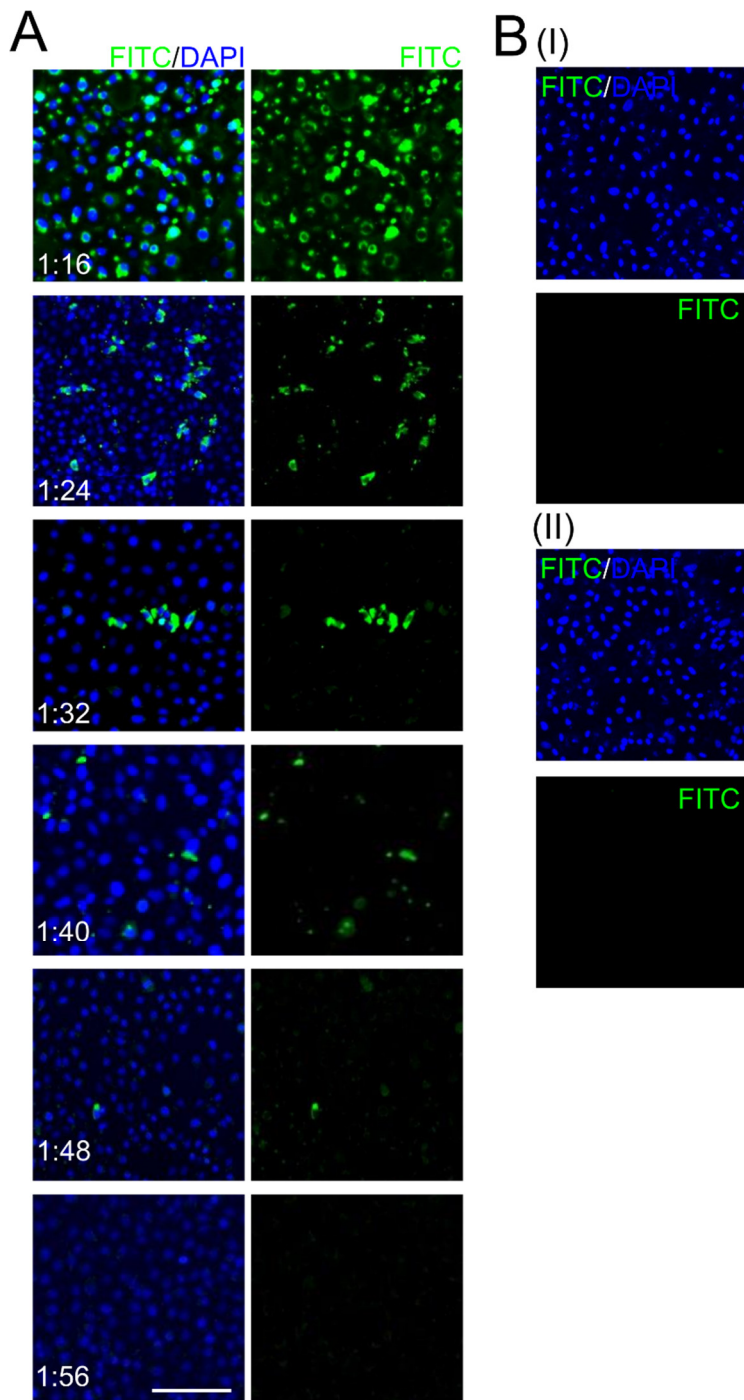

**Figure S1: Immunofluorescence characterization of anti-SARS-CoV-2 IgG in SARS-CoV-2 spike stably expressing cells.** Cells were imaged using an automated Evos FL Auto 2 microscopic system. (A) Indirect staining of A549 stable cells incubated with serum from a SARS-CoV-2 positive patient and FITC-conjugated (green) antibodies against human IgG. (B) (I) serum from a PCR confirmed negative donor sample and (II) spike-expressing stable A549 cells without serum. Nuclei were stained with DAPI (blue). Scale bar: 100  $\mu$ m.

**Figure S2. Nucleotide sequence of SARS-CoV-2.**

>SARS-CoV-2\_Jenner

TTCGTGTTCTCTGGTGCTGCTGCCACTGGTGTCTAGCCAGTGTGTGAACCTGACCACCAGGACACAGCTGCCTCCAGCCTACACCAACAGC  
TTCACCAGAGGCGTGTA TACCAGACAAGGTGTTTCAGATCCAGCGTGCTGCACTCTACCAGGACCTGTTCTCTGCCTTTCTTCAGCAAC  
GTGACCTGGTTCCACGCCATCCACGTGTCCGGCACCAATGGCACCAAGAGATTTCGACAACCCAGTGCTGCCCTTCAACGACGGAGTGTA  
TTTGCCAGCACCGAGAAGTCCAACATCATCAGAGGCTGGATCTTCGGCACCACTGGACAGCAAGACCCAGAGCCTGCTGATCGTGAAC  
AACGCCACCAACGTGGTCATCAAAGTGTGCGAGTTCAGTTCGTGCAACGACCCATTCTGGGCGTCTACTACCACAAGAACAACAAGAGC  
TGGATGGAAGCGAGTTCGGGTGTACAGCAGCGCCAACAACTGCACCTTCGAGTACGTGTCCAGCCTTTCCTGATGGACCTGGAAGGC  
AAGCAGGGCAACTTCAAGAACCTGCGCGAGTTCGTGTTCAAGAACATCGACGGCTACTTCAAGATCTACAGCAAGCACACACCTATCAAC  
CTCGTGCGGGATCTGCCTCAGGGCTTCTCTGCTCTGGAACCCTGGTGGATCTGCCCATCGGCATCAACATCACCCGGTTTCAGACACTG  
CTGGCCCTGCACAGAAGCTACCTGACACCTGGCGATAGCAGCTCTGGATGGACAGCTGGCGCCGTGCCTACTATGTGGGATACCTGCAG  
CCTCGGACCTTCTGCTGAAGTACAACGAGAACGGCACCATCACCGACGCGGTGGATTGTGCTCTGGATCCTCTGAGCGAGACAAAGTGC  
ACCCTGAAGTCTTCAACCGTGGAAAAGGGCATCTACCAGACCAGCAACTTCCGGGTGCAGCCACCGAATCCATCGTGCGGTTCCCGAAT  
ATCACCAATCTGTGCCCATTCGGCGAGGTGTTCAATGCCACCAGATTGCCTCTGTGTACGCCTGGAACCGGAAGCGGATCAGCAATTGC  
GTGGCCGACTACTCCGTGCTGTACAACCTCGCCAGCTTCAGCACCTTCAAGTGTCTACGGCGTGTCACCTACCAAGCTGAACGACCTGTGC  
TTCACAAACGTGTACGCCGACAGCTTCGTGATCCGTGGAGATGAAGTGCGGCAGATTGCACCTGGACAGACAGGCAAGATCGCCGACTAC  
AACTACAAGCTGCCCCGACGACTTCACCGCTGTGTGATTGCCTGGAACAGCAACAACCTGGATAGCAAAGTCGGCGGCAACTACAATTAC  
CTGTACCGGCTGTTCGGGAAGTCCAATCTGAAGCCCTTCGAGCGGGACATCTCCACCGAGATCTATCAGGCCGGCAGCACACCTTGTAAC  
GGCGTGGAAGGCTTCAACTGCTACTTCCCCTGAGTCTACGGCTTTCAGCCCAAAATGGCGTGGGCTACCAGCCTTACAGAGTGGTG  
GTGCTGAGCTTCGAGCTGCTGCATGCTCTGCCACAGTGTGCGGCCCTAAGAAAAGCACCAATCTCGTGAAGAACAATGCGTGAAGTTC  
AACTTCAACGGCCTGACCGGCACCGGCGTGCTGACAGAGAGCAACAAGAAGTTCCTGCCATTCCAGCAGTTCGGCCGGGATATCGCCGAT  
ACCACAGATGCCGTGAGAGATCTCAGACACTGGAAATCCTGGACATCACACCTTGACAGCTTCGGCGGAGTGTCTGTGATCACGCCTGGC  
ACCAACACCAGCAATCAGGTGGCAGTGTGTACCAGGACGTGAAGTGTACCGAAGTGGCCGTGGCCATTACGCGCGATCAGCTGACACCT  
ACATGGCGGGTGTACTCCACCGGCGAGCAATGTGTTTCAGACCAGAGCCGGCTGTCTGATCGGAGCCGAGCACGTGAACAATAGCTACGAG  
TGCGACATCCCTATCGGCGCTGGCATCTGCGCCTCTTACCAGACACAGACAAACAGCCCTAGACGGGCCAGATCTGTGGCCAGCCAGAGC  
ATCATTGCCTACACAATGTCTCTGGGCGCGAGAACAGCGTGGCTACTCCAACAACCTCTATCGTATCCCGACCAACTTCACCATCAGC  
GTGACCACAGAGATCCTGCCTGTGTCCATGACCAAGACCAGCGTGGACTGCACCATGTACATCTGCGGCGATTCCACCGAGTGTCCAAC  
CTGCTGCTGCAGTACGGCAGCTTCTGCACCCAGCTGAATAGAGCCCTGACAGGGATCGCCGTGGAACAGGACAAGAACACCCAAGAGGTG  
TTCGCCCAAGTGAAGCAGATCTACAAGACGCCTCCTATCAAGGACTTCGGCGGCTTCAATTTTCAGCCAGATTCTGCCGATCCTAGCAAG  
CCCAGCAAGCGGAGCTTCATCGAGGACCTGCTGTTCAACAAGTGACACTGGCCGACGCGGCTTCATCAAGCAGTATGGCGATTGTCTG  
GGCGACATTGCGCGCAGGATCTGATTTGCGCCAGAAAGTTTAAACGACTGACAGTGTGCCTCCTCTGTGACCGATGAGATGATCGCC  
CAGTACACATCTGCCCTGCTGGCCGGCACAAATCACAAGCGGTGGACATTGGAGCTGGCGCTGCCCTGCAGATCCCATTGTCTATGCA  
ATGGCCTACCGGTTCAACGGCATCGGAGTGACCCAGAATGTGCTGTACGAGAACCAGAAGCTGATCGCCAACCAGTTCAACAGCGCCATC  
GGCAAGATCCAGGACAGCTGAGCAGCACAGCAAGCGCCCTGGGAAAGCTGCAGGACGTGGTCAACCAGAATGCCAGGCACTGAACACC  
CTGGTCAAGCAGTGTCTAGCAACTTCGCGCCATCAGCTCTGTGCTGAACGATATCCTGAGCAGACTGGACAAGGTGGAAGCCGAGGTG  
CAGATCGACAGACTGATCACCGGAAGGCTGCAGTCCCTGCAGACCTACGTTACCCAGCAGCTGATCAGAGCCGCCGAGATTAGAGCCTCT  
GCCAATCTGGCCGCCACCAAGATGTCTGAGTGTGTGCTGGGCCAGAGCAAGAGAGTGGACTTTTGCGGCAAGGGCTACCACCTGATGAGC  
TTCCTCAGTCTGCGCCTACGGCGTGGTGTTCGTGACGTGACATACGTGCCCGCTCAAGAGAAGAATTTACACCACCGCTCCAGCCATC  
TGCCACGACGGCAAAGGCCACTTTCTTAGAGAAGGCGTGTTCGTGTCCAACGGCACCCATTGGTTCGTGACCCAGCGGAACCTTCTACGAG  
CCTCAGATCATCACACCACGACAACACCTTCGTGTCTGGCAACTGCGACGTCTGTGATCGGCATTGTGAACAATACCGTGTACGACCCCTCTG  
CAGCCCGAGCTGGACAGCTTCAAAGAGGAAGTGGATAAGTACTTTAAGAACACACAAGCCCTGACGTGGACCTGGGCGATATCAGCGGA  
ATCAATGCCAGCGTCTGTAACATCCAGAAAGAGATCGACCGGTGAACGAGGTGGCCAAGAATCTGAACGAGAGCCTGATCGACCTGCAA  
GAACTGGGCAAGTACGAGCAGTACATCAAGTGGCCCTGGTACATCTGGTGGGCTTTATCGCCGACTGATTGCCATCGTGATGGTCACA  
ATCATGCTGTGTTGCATGACCAGCTGCTGTAGCTGCCTGAAGGGCTGTTGTAGCTGTGGCTCCTGCTGCAAGTTCGACGAGGACGATTCT  
GAGCCCGTGTGAAGGGCGTGAAACTGCACTACACCTGA

>Spike\_Receptor\_CO

GGATCCATGTTCTCTGCTGACCACCAAGAGAACCATGTTTCGTGTTCTGGTGCTGCTGCCTCTGGTGAGCAGCCAGTGCGTGAATCTGACC  
ACCAGAACCCAGCTGCCTCCTGCCTACACCAATAGCTTCACCAGAGGAGTTTATTATCCCGATAAGGTGTTTCAGAAGTAGTGATTACAT  
AGTACCCAGGACCTGTTCTACCTTTCTTCAGTAACGTGACCTGGTTCACGCCATCCACGTGAGCGGCACCAATGGCACCAGAGATTC  
GACAATCTGTGCTGCCTTTCAATGACGGCGTGTACTTCGCCAGCACCGAGAAGCAATATCATCAGAGGCTGGATCTTCGGCACCAACC  
TTGGATTCCAAGACTCAGAGCCTGCTGATTGTAAACAACGCTACAATGTGGTGATCAAGGTGTGCGAGTTCAGTTCTGCAATGACCTT  
TTCCTGGGTGTTTATTATCATAAGAACAACAAGAGCTGGATGGAGAGCGAGTTCCGCGTATATTCTGTCGGCTAATAATTGCACCTTCGAG

TACGTGAGCCAGCCTTTCCTGATGGACCTGGAGGGCAAGCAGGGCAATTTCAAGAATCTGAGAGAGTTTCGTGTTCAAGAATATCGACGGC  
TACTTCAAGATCTACAGCAAGCACACCCATTAACTCTGGTGAGAGACCTGCCTCAGGGCTTCAGCGCCCTGGAGCCTCTGGTGGACCTG  
CCTATCGGCATCAATATCACCAGATTCCAGACCCTGCTGGCCCTGCACAGATCATATCTTACACCAGGCGATTTCGTCAAGCGGTTGGACC  
GCTGGAGCTGCGGCATATTACGTGGGCTACCTGCAGCCTAGAACCTTCCTGCTGAAGTACAATGAGAATGGTACGATAACCGACGCAGTT  
GATTGTGCCCTGGACCTCTGAGCGAGACCAAGTGCACCCTGAAGAGCTTCACCGTGAGAAAGGCATCTACCAGACCAGCAATTTCAGA  
GTGCAGCCTACCGAGAGCATCGTGAGATTCCCTAATATCACCAATCTGTGCCCTTTCGGCGAGGTGTTCAATGCCACCAGATTTCGCCAGC  
GTGTACGCATGGAACCGCAAGCGGATAAGCAATTGCGTGGCCGACTACAGCGTGTGTACAATAGCGCCAGCTTCAGCACCTTCAAATGT  
TATGGTGTTCGCCAACAAAGCTGAATGACCTGTGCTTCACCAATGTGTACGCCGACAGCTTCGTGATCAGAGGCGACGAGGTGAGACAG  
ATCGCGCCAGGGCAGACCGGCAAGATCGCCGACTACAATTACAAGCTGCCTGACGACTTCACCGGCTGCGTGATCGCGTGAACTCTAAC  
AATCTAGATTGAAAAGTTGGAGGCAATTACAATTACCTGTACAGACTGTTTCAGAAAGAGCAATCTGAAGCCTTTCGAGAGAGACATCAGC  
ACCGAGATCTACCAGGCCGCGCAGCACACCGTGTAAATGGCGTGGAGGGCTTCAATTGCTACTTCCCTCTGCAGAGCTACGGCTTCAGCCT  
ACCAATGGCGTGGGCTACCAGCCTTACAGAGTGGTGGTGTGAGCTTCGAGCTGTGCACGCTCCCGCTACCGTGTGCGGCCCTAAGAAG  
AGCACCAATCTGGTGAAGAATAAGTGCCTGAATTTCAATTTCAATGGTCTAACTGGAACGGGCGTGTGACCGAGAGCAATAAGAAGTTT  
CTTCCCTTTCAACAATTCGGCAGAGACATCGCCGACACCACAGATGCTGTAAGAGACCCTCAGACCCTGGAGATCCTGGACATCACTCCG  
TGTAAGCTTCGGCGGCGTGAGCGTGATCACACCGGTACCAATACCAGCAATCAGGTGGCCGTGCTGTACCAGGACGTGAATTGCACCGAG  
GTGCTGTGGCCATCCACGCCGACCAGCTGACTCCACTTGGAGGGTATATTCCACGGGAAGCAATGTGTTCAGACCAGAGCCGGCTGC  
CTGATCGGCGCCGAGCAGCTGAATAATAGCTACGAGTGCAGACATCCCTATCGGCGCCGGCATCTGCGCCAGCTACCAGACCAGACCAAT  
AGCCCTAGAAGAGCCAGAAGCGTGGCCAGCCAGAGCATCATCGCTACACCATGAGCCTGGGCGCCGAGAATAGCGTGGCTTACAGCAAT  
AATAGCATCGCCATCCCTACCAATTTACCATCAGCGTGACCACCGAAATATTACCAGTCTCCATGACCAAGACCAGCGTGGACTGCACC  
ATGTACATCTGCGGCGACAGCACCGAGTGCAGCAATCTGTGCTGCAGTACGGCAGCTTCTGCACCCAGCTGAATAGAGCCCTGACCGGC  
ATCGCCGTGGAGCAGGACAAGAATACCCAGGAGGTGTTTCGCCAGGTGAAGCAGATCTACAAGACTCCGCCGATCAAGGACTTCGGCGGC  
TTCAATTTTCAGCCAAATACTCCCAGATCCAAGCAAGCCTAGCAAGAGGAGCTTCATCGAGGACCTGCTGTTCAATAAGGTGACCTGGCC  
GACGCCGGCTTTCATCAAGCAGTACGGCGACTGCCTAGGTGATATTGCGGCAAGAGACCTGATCTGCGCCCAGAAGTTTAAACGGTTTGACA  
GTACTACCTCCTCTGCTGACCGACGAGATGATAGCACAATATACGTGCGCATTTGCTCGCTGGCAGCATCACATCGGGCTGGACTTTCGGC  
GCCGGAGCAGCGTTGCAAATCCCTTTCGCCATGCAGATGGCTTACAGATTCAATGGCATCGGCGTGACCCAGAATGTGCTGTACGAGAAT  
CAGAAGCTGATCGCCAATCAGTTCAATAGCGCCATCGGCAAGATCCAGGACAGCCTGAGCAGCACCGCCAGCGCCCTGGGCAAGCTGCAG  
GACGTGGTGAATCAGAATGCCCAGGCCCTGAATACCCTGGTGAAGCAGCTGAGCAGCAATTTTCGGCGCCATCAGTAGTGTACTCAACGAT  
ATCCTGAGCAGACTGGACAAGGTGGAGGCCGAGGTGCAAATTGATCGTCTTATTACTGGCAGACTGCAGAGCCTGCAGACCTACGTGACC  
CAGCAGCTGATCAGAGCCGCCGAGATCAGAGCCAGCGCAATCTGGCCGCCACCAAGATGAGCGAGTGCCTGCTGGGCCAGAGCAAGAGA  
GTGGACTTCTGCGGCAAGGGCTACCACCTGATGAGCTTCCCTCAGAGCGCTCCACATGGCGTGGTGTTCCTGCACGTGACCTACGTGCCT  
GCCAGGAGAAGAATTTTACCACCGCACCCGCAATCTGCCACGACGGCAAGGCCCACTTCCCTAGAGAGGGCGTGTTCGTGAGCAATGGC  
ACCCACTGGTTTCGTGACCCAGAGAAATTTCTACGAGCCTCAGATCATCACCACCGACAATACCTTCGTGAGCGGCAATTGCGACGTGGTG  
ATCGGGATAGTCAATAATACTGTCTACGACCTCTGCAGCCTGAGCTGGACAGCTTCAAGGAGGAGCTGGACAAGTACTTCAAGAATCAC  
ACCAGCCCTGACGTGGACCTCGGTGATATTTTCGGGAATCAATGCCAGCGTGGTGAATATCCAGAAGGAAATTGATCGGCTCAACGAAGTG  
GCCAAGAATCTGAATGAGAGCCTGATCGACCTGCAGGAGCTGGGCAAGTACGAGCAGTACATCAAGTGGCCTTGGTACATCTGGCTGGGC  
TTCATCGCCGGCCTGATCGCCATCGTGATGGTGACCATCATGCTGTGCTGCATGACCTCCTGTTGTTCTGTTTGAAGGGTGTGTTTCG  
TGTGGGTCTGCTGCAAGTTCGACGAGGACGACAGCGAGCCTGTGCTGAAGGGCGTGAAGCTGCACTACACCTGGAGCCACCCTCAGTTC  
GAGAAGTGAGAATTC
